# Supplementary material
Source: publisher site journal article supplement (https://static.cambridge.org/content/id/urn:cambridge.org:id:article:S0043887114000343/resource/name/S0043887114000343_supp_mat.pdf)
Supplement: Supplementary file 1 [file S0043887114000343_supp_mat.pdf]

**Online Appendix: Supplemental Analysis Results**  
For “How International Organizations Support Democratization”

**TABLE OF CONTENTS**

|                                                                               |           |
|-------------------------------------------------------------------------------|-----------|
| <b>Descriptive Statistics</b>                                                 | <b>2</b>  |
| <b>Variable Correlations</b>                                                  | <b>5</b>  |
| <b>Country Lists</b>                                                          | <b>8</b>  |
| <b>Additional Robustness Check 1: Post-Cold War Time Period</b>               | <b>11</b> |
| <b>Additional Robustness Check 2: Control for Affinity Score with US</b>      | <b>13</b> |
| <b>Additional Robustness Check 3: Control for S-score with US</b>             | <b>15</b> |
| <b>Cross Tabs of IO Influence on Autocratic Reversal, by IO Independence</b>  | <b>17</b> |
| <b>Cross Tabs of IO Influence on Autocratic Reversal, by IO Demo. Density</b> | <b>18</b> |

## Descriptive Statistics

### 1. Summary of All Countries

```
. sum if year>=1965 & established_dem==0
```

| Variable    | Obs  | Mean     | Std. Dev. | Min       | Max      |
|-------------|------|----------|-----------|-----------|----------|
| year_dem    | 1289 | 23.41117 | 28.28759  | 1         | 118      |
| new_member  | 1289 | .7470908 | .4348481  | 0         | 1        |
| NAmerica    | 1289 | .0356866 | .1855795  | 0         | 1        |
| SAmerica    | 1289 | .2629946 | .4404304  | 0         | 1        |
| Asia        | 1289 | .1512801 | .3584607  | 0         | 1        |
| Oceania     | 1289 | 0        | 0         | 0         | 0        |
| Europe      | 1289 | .3770365 | .4848323  | 0         | 1        |
| MidEast     | 1289 | .0426687 | .2021876  | 0         | 1        |
| year        | 1289 | 1987.925 | 10.66979  | 1965      | 2001     |
| IO_N_diff   | 1220 | 22.97787 | 23.70011  | -4        | 93       |
| dem_5_year  | 1289 | .2746315 | .4465016  | 0         | 1        |
| mil         | 1289 | .4437548 | .4970192  | 0         | 1        |
| IO_diff_mil | 1220 | 4.490984 | 8.022778  | -4        | 43       |
| gdp         | 1289 | 8.403896 | 1.00644   | 5.929589  | 10.10969 |
| growth      | 1289 | 1.416039 | 5.390238  | -42.32584 | 84.97652 |
| exec_pres   | 1289 | .3910008 | .488164   | 0         | 1        |

## 2. Summary of Countries with History of Military Rule

```
. sum if mil~=0 & year>=1965 & established_dem==0
```

| Variable   | Obs | Mean     | Std. Dev. | Min       | Max      |
|------------|-----|----------|-----------|-----------|----------|
| year_dem   | 572 | 11.09441 | 9.505911  | 1         | 44       |
| new_member | 572 | .7552448 | .4303183  | 0         | 1        |
| NAmerica   | 572 | .013986  | .1175353  | 0         | 1        |
| SAmerica   | 572 | .541958  | .4986725  | 0         | 1        |
| Asia       | 572 | .1118881 | .3155047  | 0         | 1        |
| Oceania    | 572 | 0        | 0         | 0         | 0        |
| Europe     | 572 | .0944056 | .2926481  | 0         | 1        |
| MidEast    | 572 | .0681818 | .2522783  | 0         | 1        |
| year       | 572 | 1988.897 | 9.677905  | 1965      | 2001     |
| IO_N_diff  | 542 | 10.10886 | 9.387979  | -4        | 43       |
| dem_5_year | 572 | .3409091 | .4744297  | 0         | 1        |
| gdp        | 572 | 8.122761 | .8781599  | 5.929589  | 9.593764 |
| growth     | 572 | 1.189478 | 4.168966  | -26.80965 | 11.67349 |
| exec_pres  | 572 | .6398601 | .4804609  | 0         | 1        |

### 3. Summary of Countries without History of Military Rule

```
. sum if mil==0 & year>=1965 & established_dem==0
```

| Variable   | Obs | Mean     | Std. Dev. | Min       | Max      |
|------------|-----|----------|-----------|-----------|----------|
| year_dem   | 717 | 33.2371  | 33.90435  | 1         | 118      |
| new_member | 717 | .7405858 | .4386192  | 0         | 1        |
| NAmerica   | 717 | .0529986 | .2241871  | 0         | 1        |
| SAmerica   | 717 | .0404463 | .1971411  | 0         | 1        |
| Asia       | 717 | .1827057 | .3866948  | 0         | 1        |
| Oceania    | 717 | 0        | 0         | 0         | 0        |
| Europe     | 717 | .6025105 | .4897204  | 0         | 1        |
| MidEast    | 717 | .0223152 | .1478097  | 0         | 1        |
| year       | 717 | 1987.149 | 11.34644  | 1965      | 2001     |
| IO_N_diff  | 678 | 33.26549 | 26.50237  | -1        | 93       |
| dem_5_year | 717 | .2217573 | .4157187  | 0         | 1        |
| gdp        | 717 | 8.628178 | 1.045762  | 6.257668  | 10.10969 |
| growth     | 717 | 1.596782 | 6.191259  | -42.32584 | 84.97652 |
| exec_pres  | 717 | .1924686 | .3945143  | 0         | 1        |

## Variable Correlations

### 1. Correlations using All Countries

```
. corr if year>=1965 & established_dem==0
```

|             | year_dem | new_me~r | NAmerica | SAmerica | Asia    | Oceania | Europe  | MidEast |
|-------------|----------|----------|----------|----------|---------|---------|---------|---------|
| year_dem    | 1.0000   |          |          |          |         |         |         |         |
| new_member  | -0.0244  | 1.0000   |          |          |         |         |         |         |
| NAmerica    | -0.0552  | -0.0321  | 1.0000   |          |         |         |         |         |
| SAmerica    | -0.2073  | 0.0394   | -0.1154  | 1.0000   |         |         |         |         |
| Asia        | -0.1553  | -0.0407  | -0.0806  | -0.2545  | 1.0000  |         |         |         |
| Oceania     | .        | .        | .        | .        | .       | 1.0000  |         |         |
| Europe      | 0.5317   | 0.0188   | -0.1495  | -0.4723  | -0.3296 | .       | 1.0000  |         |
| MidEast     | -0.0842  | -0.0354  | -0.0411  | -0.1300  | -0.0907 | .       | -0.1683 | 1.0000  |
| year        | -0.1491  | 0.0891   | -0.0275  | -0.0645  | 0.0467  | .       | -0.0186 | -0.1695 |
| IO_N_diff   | 0.9014   | 0.0234   | -0.1145  | -0.3121  | -0.1357 | .       | 0.6546  | -0.1117 |
| dem_5_year  | -0.4546  | 0.0468   | -0.0111  | -0.0532  | 0.0515  | .       | -0.1973 | -0.0020 |
| mil         | -0.3977  | 0.0169   | -0.1083  | 0.5747   | -0.1002 | .       | -0.5225 | 0.1124  |
| IO_diff_mil | -0.1047  | 0.0828   | -0.0915  | 0.4261   | -0.0961 | .       | -0.2286 | -0.0072 |
| gdp         | 0.6333   | 0.0099   | -0.1595  | -0.0462  | -0.1521 | .       | 0.6293  | -0.0809 |
| growth      | 0.1160   | -0.0521  | 0.0428   | -0.0757  | 0.0898  | .       | 0.0279  | 0.0433  |
| exec_pres   | -0.3188  | 0.0555   | 0.1748   | 0.7385   | -0.1171 | .       | -0.5989 | -0.1724 |

  

|             | year    | IO_N_d~f | dem_5_~r | mil     | IO_dif~l | gdp     | growth  | exec_p~s |
|-------------|---------|----------|----------|---------|----------|---------|---------|----------|
| year        | 1.0000  |          |          |         |          |         |         |          |
| IO_N_diff   | 0.0289  | 1.0000   |          |         |          |         |         |          |
| dem_5_year  | 0.0603  | -0.4328  | 1.0000   |         |          |         |         |          |
| mil         | 0.0888  | -0.4857  | 0.1326   | 1.0000  |          |         |         |          |
| IO_diff_mil | 0.2399  | -0.0985  | -0.2124  | 0.6263  | 1.0000   |         |         |          |
| gdp         | -0.1065 | 0.6695   | -0.4099  | -0.2472 | 0.0483   | 1.0000  |         |          |
| growth      | -0.0912 | 0.0927   | -0.2025  | -0.0280 | -0.0222  | 0.1514  | 1.0000  |          |
| exec_pres   | 0.0241  | -0.4155  | 0.0691   | 0.4601  | 0.3127   | -0.2854 | -0.1343 | 1.0000   |

## 2. Correlations using Countries with History of Military Rule

```
. corr if mil~=0 & year>=1965 & established_dem==0
```

|            | year_dem | new_me~r | NAmerica | SAmerica | Asia    | Oceania | Europe  | MidEast |
|------------|----------|----------|----------|----------|---------|---------|---------|---------|
| year_dem   | 1.0000   |          |          |          |         |         |         |         |
| new_member | 0.0727   | 1.0000   |          |          |         |         |         |         |
| NAmerica   | -0.0839  | -0.0235  | 1.0000   |          |         |         |         |         |
| SAmerica   | 0.3265   | 0.0616   | -0.1269  | 1.0000   |         |         |         |         |
| Asia       | -0.1701  | -0.0120  | -0.0404  | -0.3914  | 1.0000  |         |         |         |
| Oceania    | .        | .        | .        | .        | .       | .       |         |         |
| Europe     | 0.0907   | -0.0070  | -0.0373  | -0.3614  | -0.1149 | .       | 1.0000  |         |
| MidEast    | -0.0255  | -0.0591  | -0.0314  | -0.3046  | -0.0969 | .       | -0.0894 | 1.0000  |
| year       | 0.0519   | 0.0628   | 0.1057   | -0.2376  | 0.1805  | .       | -0.0256 | -0.1489 |
| IO_N_diff  | 0.8393   | 0.1408   | -0.0745  | 0.1133   | -0.0731 | .       | 0.3128  | -0.1203 |
| dem_5_year | -0.6278  | -0.0158  | 0.0877   | -0.2434  | 0.0750  | .       | -0.1069 | -0.0493 |
| gdp        | 0.4239   | 0.0592   | -0.1937  | 0.3235   | -0.0787 | .       | 0.3906  | 0.0219  |
| growth     | -0.0270  | 0.0225   | -0.0432  | -0.0956  | 0.2199  | .       | 0.0889  | 0.0929  |
| exec_pres  | 0.2065   | 0.0730   | -0.1532  | 0.7973   | -0.2885 | .       | -0.4363 | -0.3678 |

  

|            | year    | IO_N_d~f | dem_5_~r | gdp    | growth  | exec_p~s |
|------------|---------|----------|----------|--------|---------|----------|
| year       | 1.0000  |          |          |        |         |          |
| IO_N_diff  | 0.3918  | 1.0000   |          |        |         |          |
| dem_5_year | -0.1076 | -0.5368  | 1.0000   |        |         |          |
| gdp        | -0.1893 | 0.4521   | -0.3776  | 1.0000 |         |          |
| growth     | -0.0685 | -0.0115  | -0.0783  | 0.1990 | 1.0000  |          |
| exec_pres  | -0.0961 | 0.0481   | -0.1159  | 0.1894 | -0.1714 | 1.0000   |

### 3. Correlations using Countries with No History of Military Rule

```
. corr if mil==0 & year>=1965 & established_dem==0
```

|            | year_dem | new_me~r | NAmerica | SAmerica | Asia    | Oceania | Europe  | MidEast |
|------------|----------|----------|----------|----------|---------|---------|---------|---------|
| year_dem   | 1.0000   |          |          |          |         |         |         |         |
| new_member | -0.0420  | 1.0000   |          |          |         |         |         |         |
| NAmerica   | -0.1124  | -0.0350  | 1.0000   |          |         |         |         |         |
| SAmerica   | -0.1116  | -0.0027  | -0.0482  | 1.0000   |         |         |         |         |
| Asia       | -0.2416  | -0.0566  | -0.1120  | -0.0963  | 1.0000  |         |         |         |
| Oceania    | .        | .        | .        | .        | .       |         |         |         |
| Europe     | 0.4725   | 0.0521   | -0.2938  | -0.2527  | -0.5870 | .       | 1.0000  |         |
| MidEast    | -0.0711  | -0.0125  | -0.0368  | -0.0317  | -0.0736 | .       | -0.1929 | 1.0000  |
| year       | -0.1710  | 0.1049   | -0.0612  | -0.0315  | -0.0126 | .       | 0.0572  | -0.2411 |
| IO_N_diff  | 0.8884   | 0.0115   | -0.2105  | -0.2017  | -0.2580 | .       | 0.5875  | -0.0672 |
| dem_5_year | -0.4907  | 0.0989   | -0.0349  | -0.0031  | 0.0604  | .       | -0.1866 | 0.0311  |
| gdp        | 0.6934   | -0.0141  | -0.1993  | -0.1708  | -0.2398 | .       | 0.6997  | -0.1483 |
| growth     | 0.1413   | -0.0915  | 0.0628   | -0.0809  | 0.0305  | .       | -0.0080 | 0.0148  |
| exec_pres  | -0.3102  | 0.0362   | 0.4885   | 0.4201   | 0.0817  | .       | -0.5399 | -0.0754 |

  

|            | year    | IO_N_d~f | dem_5_~r | gdp     | growth  | exec_p~s |
|------------|---------|----------|----------|---------|---------|----------|
| year       | 1.0000  |          |          |         |         |          |
| IO_N_diff  | 0.0145  | 1.0000   |          |         |         |          |
| dem_5_year | 0.1712  | -0.4629  | 1.0000   |         |         |          |
| gdp        | -0.0303 | 0.7405   | -0.4123  | 1.0000  |         |          |
| growth     | -0.0993 | 0.1128   | -0.2856  | 0.1282  | 1.0000  |          |
| exec_pres  | 0.0447  | -0.4010  | 0.1477   | -0.5205 | -0.1241 | 1.0000   |

## Country Lists

### 1. Countries that had a previous military regime

```
. tab country if year_dem==1 & mil~=0 & established_dem==0
```

| country | Freq. | Percent | Cum.   |
|---------|-------|---------|--------|
| ARG     | 4     | 6.35    | 6.35   |
| BEN     | 1     | 1.59    | 7.94   |
| BNG     | 1     | 1.59    | 9.52   |
| BOL     | 2     | 3.17    | 12.70  |
| BRA     | 2     | 3.17    | 15.87  |
| BUI     | 1     | 1.59    | 17.46  |
| CDI     | 1     | 1.59    | 19.05  |
| CEN     | 1     | 1.59    | 20.63  |
| CHL     | 2     | 3.17    | 23.81  |
| COL     | 1     | 1.59    | 25.40  |
| CON     | 1     | 1.59    | 26.98  |
| CUB     | 1     | 1.59    | 28.57  |
| ECU     | 2     | 3.17    | 31.75  |
| GHA     | 3     | 4.76    | 36.51  |
| GNB     | 1     | 1.59    | 38.10  |
| GRC     | 2     | 3.17    | 41.27  |
| GUA     | 4     | 6.35    | 47.62  |
| HAI     | 1     | 1.59    | 49.21  |
| HON     | 3     | 4.76    | 53.97  |
| INS     | 1     | 1.59    | 55.56  |
| LES     | 1     | 1.59    | 57.14  |
| MAG     | 1     | 1.59    | 58.73  |
| MLI     | 1     | 1.59    | 60.32  |
| MYA     | 1     | 1.59    | 61.90  |
| NIG     | 2     | 3.17    | 65.08  |
| NIR     | 2     | 3.17    | 68.25  |
| PAK     | 1     | 1.59    | 69.84  |
| PAN     | 3     | 4.76    | 74.60  |
| PER     | 3     | 4.76    | 79.37  |
| POR     | 1     | 1.59    | 80.95  |
| ROK     | 1     | 1.59    | 82.54  |
| SAL     | 1     | 1.59    | 84.13  |
| SIE     | 2     | 3.17    | 87.30  |
| SPN     | 1     | 1.59    | 88.89  |
| SUD     | 1     | 1.59    | 90.48  |
| THI     | 2     | 3.17    | 93.65  |
| TUR     | 2     | 3.17    | 96.83  |
| URU     | 1     | 1.59    | 98.41  |
| VEN     | 1     | 1.59    | 100.00 |
| Total   | 63    | 100.00  |        |



## 2. Countries that had a previous military regime

```
. tab country if year_dem==1 & mil==0 & established_dem==0
```

| country | Freq. | Percent | Cum.   |
|---------|-------|---------|--------|
| ALB     | 1     | 1.82    | 1.82   |
| ARG     | 1     | 1.82    | 3.64   |
| BEL     | 1     | 1.82    | 5.45   |
| BUL     | 1     | 1.82    | 7.27   |
| CAP     | 1     | 1.82    | 9.09   |
| CHL     | 1     | 1.82    | 10.91  |
| COL     | 1     | 1.82    | 12.73  |
| CON     | 1     | 1.82    | 14.55  |
| CZE     | 1     | 1.82    | 16.36  |
| DEN     | 1     | 1.82    | 18.18  |
| DOM     | 1     | 1.82    | 20.00  |
| FIN     | 1     | 1.82    | 21.82  |
| FRN     | 3     | 5.45    | 27.27  |
| GMY     | 1     | 1.82    | 29.09  |
| GRC     | 1     | 1.82    | 30.91  |
| HUN     | 1     | 1.82    | 32.73  |
| INS     | 1     | 1.82    | 34.55  |
| ITA     | 2     | 3.64    | 38.18  |
| JPN     | 1     | 1.82    | 40.00  |
| KEN     | 1     | 1.82    | 41.82  |
| LAO     | 1     | 1.82    | 43.64  |
| MAW     | 1     | 1.82    | 45.45  |
| MEX     | 1     | 1.82    | 47.27  |
| MON     | 1     | 1.82    | 49.09  |
| NEP     | 1     | 1.82    | 50.91  |
| NIC     | 1     | 1.82    | 52.73  |
| NIG     | 1     | 1.82    | 54.55  |
| NOR     | 1     | 1.82    | 56.36  |
| NTH     | 1     | 1.82    | 58.18  |
| PER     | 1     | 1.82    | 60.00  |
| PHI     | 1     | 1.82    | 61.82  |
| POL     | 1     | 1.82    | 63.64  |
| POR     | 1     | 1.82    | 65.45  |
| ROK     | 1     | 1.82    | 67.27  |
| RUM     | 1     | 1.82    | 69.09  |
| RUS     | 1     | 1.82    | 70.91  |
| SAF     | 1     | 1.82    | 72.73  |
| SEN     | 1     | 1.82    | 74.55  |
| SIE     | 1     | 1.82    | 76.36  |
| SOM     | 1     | 1.82    | 78.18  |
| SPN     | 1     | 1.82    | 80.00  |
| SRI     | 2     | 3.64    | 83.64  |
| STP     | 1     | 1.82    | 85.45  |
| SUD     | 2     | 3.64    | 89.09  |
| TAW     | 1     | 1.82    | 90.91  |
| THI     | 1     | 1.82    | 92.73  |
| UGA     | 1     | 1.82    | 94.55  |
| URU     | 2     | 3.64    | 98.18  |
| ZAM     | 1     | 1.82    | 100.00 |
| Total   | 55    | 100.00  |        |

3. Countries that had a previous military regime, experienced democratic reversal, and joined an above median number of IOs

```
. tab country if year_dem>=1 & year_dem<=5 & mil~=0 & c==1 & established_dem==0 &
IO_N_diff>`median' & year>=1965
```

| country | Freq. | Percent | Cum.   |
|---------|-------|---------|--------|
| CON     | 4     | 36.36   | 36.36  |
| ECU     | 1     | 9.09    | 45.45  |
| NIG     | 1     | 9.09    | 54.55  |
| NIR     | 1     | 9.09    | 63.64  |
| PAK     | 1     | 9.09    | 72.73  |
| SUD     | 2     | 18.18   | 90.91  |
| THI     | 1     | 9.09    | 100.00 |
| Total   | 11    | 100.00  |        |

## Additional Robustness Check 1: Post-Cold War Time Period

### Stata Command:

```
. noi ml model lf split_weibull (dem_consolidation: year_dem = IO_N_diff mil IO_diff_mil gdp  
> growth exec_pres mills) (alpha:) (reversal: c= IO_N_diff mil IO_diff_mil gdp growth exec_pr  
> es mills) if year>1991 & established_dem==0, robust  
  
. noi ml maximize, iterate(20000)
```

### Regression Output (Key Variables):

| <i>Consolidation Model</i>                       |                    |
|--------------------------------------------------|--------------------|
| New IO Membership                                | -0.01<br>(0.02)    |
| Previous Military Regime                         | -1.54***<br>(0.59) |
| New IO Memberships<br>X Previous Military Regime | 0.14***<br>(0.03)  |
| <i>Reversal Model</i>                            |                    |
| New IO Memberships                               | 0.03<br>(0.08)     |
| Previous Military Regime                         | -7.41<br>(6.79)    |
| New IO Memberships<br>X Previous Military Regime | -0.43*<br>(0.23)   |
| Number of Observations                           | 571                |

**Regression Output (Full Stata Output):**

```

initial:      log pseudolikelihood = -689.47669
alternative:  log pseudolikelihood = -408.91958
rescale:     log pseudolikelihood = -308.46175
rescale eq:  log pseudolikelihood = -260.34679
Iteration 0:  log pseudolikelihood = -260.34679 (not concave)
...
Iteration 276: log pseudolikelihood = -140.30669

                                Number of obs   =      571
                                Wald chi2(7)      =     154.56
                                Prob > chi2       =      0.0000

Log pseudolikelihood = -140.30669

```

|              | Coef.     | Robust Std. Err. | z     | P> z  | [95% Conf. Interval] |           |
|--------------|-----------|------------------|-------|-------|----------------------|-----------|
| -----        |           |                  |       |       |                      |           |
| dem_consol~n |           |                  |       |       |                      |           |
| IO_N_diff    | -.0121274 | .017033          | -0.71 | 0.476 | -.0455115            | .0212566  |
| mil          | -1.542588 | .5882181         | -2.62 | 0.009 | -2.695475            | -.3897019 |
| IO_diff_mil  | .1449925  | .0302977         | 4.79  | 0.000 | .0856102             | .2043749  |
| gdp          | -.010704  | .1470609         | -0.07 | 0.942 | -.2989381            | .2775301  |
| growth       | .0054499  | .0176463         | 0.31  | 0.757 | -.0291362            | .0400361  |
| exec_pres    | -.1209159 | .1305673         | -0.93 | 0.354 | -.3768231            | .1349913  |
| mills        | -.0700203 | .0814237         | -0.86 | 0.390 | -.2296078            | .0895673  |
| _cons        | 2.809541  | 1.215362         | 2.31  | 0.021 | .4274749             | 5.191607  |
| -----        |           |                  |       |       |                      |           |
| alpha        |           |                  |       |       |                      |           |
| _cons        | -1.132885 | .1279629         | -8.85 | 0.000 | -1.383687            | -.882082  |
| -----        |           |                  |       |       |                      |           |
| reversal     |           |                  |       |       |                      |           |
| IO_N_diff    | .0287099  | .0832811         | 0.34  | 0.730 | -.134518             | .1919379  |
| mil          | -7.405928 | 6.787007         | -1.09 | 0.275 | -20.70822            | 5.896361  |
| IO_diff_mil  | -.4259018 | .2312206         | -1.84 | 0.065 | -.8790858            | .0272823  |
| gdp          | -.3264952 | .9077902         | -0.36 | 0.719 | -2.105731            | 1.452741  |
| growth       | 1.546679  | .6688499         | 2.31  | 0.021 | .2357577             | 2.857601  |
| exec_pres    | 6.348957  | 2.702554         | 2.35  | 0.019 | 1.052049             | 11.64587  |
| mills        | -1.128374 | .5933541         | -1.90 | 0.057 | -2.291326            | .0345791  |
| _cons        | 12.27698  | 9.180256         | 1.34  | 0.181 | -5.715994            | 30.26995  |
| -----        |           |                  |       |       |                      |           |

## Additional Robustness Check 2: Control for Affinity Score with the United States

### Stata Command:

```
. noi ml model lf split_weibull (dem_consolidation: year_dem = IO_N_diff mil IO_diff_mil gdp  
> growth exec_pres s3un4608i mills)(alpha:)(reversal: c= IO_N_diff mil IO_diff_mil gdp growt  
> h exec_pres s3un4608i mills) if year>=1965 & established_dem==0, robust  
  
. noi ml maximize, iterate(20000)
```

### Regression Output (Key Variables):

| <i>Consolidation Model</i>                       |                    |
|--------------------------------------------------|--------------------|
| New IO Membership                                | 0.02***<br>(0.01)  |
| Previous Military Regime                         | -1.32***<br>(0.15) |
| New IO Memberships<br>X Previous Military Regime | 0.05***<br>(0.01)  |
| <i>Reversal Model</i>                            |                    |
| New IO Memberships                               | 0.11<br>(0.10)     |
| Previous Military Regime                         | 10.54*<br>(5.66)   |
| New IO Memberships<br>X Previous Military Regime | 0.06<br>(0.13)     |
| Number of Observations                           | 1,212              |

**Regression Output (Full Stata Output):**

```

initial:      log pseudolikelihood = -3405.2232
alternative:  log pseudolikelihood = -1651.9079
rescale:     log pseudolikelihood = -1469.0074
rescale eq:  log pseudolikelihood = -1265.5679
Iteration 0:  log pseudolikelihood = -1265.5679 (not concave)
...
Iteration 523: log pseudolikelihood = -844.57093

Number of obs = 1212
Wald chi2(8) = 872.97
Prob > chi2 = 0.0000

Log pseudolikelihood = -844.57093

```

|              | Coef.     | Robust Std. Err. | z      | P> z  | [95% Conf. Interval] |           |
|--------------|-----------|------------------|--------|-------|----------------------|-----------|
| -----        |           |                  |        |       |                      |           |
| dem_consol~n |           |                  |        |       |                      |           |
| IO_N_diff    | .0248961  | .0044371         | 5.61   | 0.000 | .0161994             | .0335927  |
| mil          | -1.321752 | .1558625         | -8.48  | 0.000 | -1.627237            | -1.016267 |
| IO_diff_mil  | .0533215  | .0087643         | 6.08   | 0.000 | .0361437             | .0704993  |
| gdp          | .6612243  | .0767009         | 8.62   | 0.000 | .5108933             | .8115553  |
| growth       | .0153549  | .0087974         | 1.75   | 0.081 | -.0018877            | .0325974  |
| exec_pres    | .181013   | .1008304         | 1.80   | 0.073 | -.0166109            | .3786369  |
| s3un4608i    | .2598135  | .1338617         | 1.94   | 0.052 | -.0025506            | .5221776  |
| mills        | -.1415729 | .0298648         | -4.74  | 0.000 | -.2001068            | -.0830389 |
| _cons        | -1.749511 | .5725843         | -3.06  | 0.002 | -2.871755            | -.627266  |
| -----        |           |                  |        |       |                      |           |
| alpha        |           |                  |        |       |                      |           |
| _cons        | -.8403053 | .0572496         | -14.68 | 0.000 | -.9525124            | -.7280981 |
| -----        |           |                  |        |       |                      |           |
| reversal     |           |                  |        |       |                      |           |
| IO_N_diff    | .1074624  | .0954232         | 1.13   | 0.260 | -.0795636            | .2944884  |
| mil          | 10.54079  | 5.664846         | 1.86   | 0.063 | -.5620998            | 21.64369  |
| IO_diff_mil  | .0633247  | .1335946         | 0.47   | 0.635 | -.198516             | .3251654  |
| gdp          | -3.792195 | .8518531         | -4.45  | 0.000 | -5.461796            | -2.122593 |
| growth       | .34936    | .1035888         | 3.37   | 0.001 | .1463296             | .5523904  |
| exec_pres    | 3.491896  | 1.006409         | 3.47   | 0.001 | 1.51937              | 5.464422  |
| s3un4608i    | -.8434425 | 1.168243         | -0.72  | 0.470 | -3.133156            | 1.446271  |
| mills        | -.6309866 | .4985865         | -1.27  | 0.206 | -1.608198            | .346225   |
| _cons        | 15.20186  | 8.780199         | 1.73   | 0.083 | -2.007018            | 32.41073  |
| -----        |           |                  |        |       |                      |           |

### Additional Robustness Check 3: Control for S-Score with the United States

#### Stata Command:

```
. noi ml model lf split_weibull (dem_consolidation: year_dem = IO_N_diff mil IO_diff_mil gdp  
> growth exec_pres s_un_glo mills)(alpha:)(reversal: c= IO_N_diff mil IO_diff_mil gdp growth  
> exec_pres s_un_glo mills) if year>=1965 & established_dem==0, robust  
  
. noi ml maximize, iterate(20000)
```

#### Regression Output (Key Variables):

| <i>Consolidation Model</i>                       |                    |
|--------------------------------------------------|--------------------|
| New IO Membership                                | 0.05***<br>(0.01)  |
| Previous Military Regime                         | -0.97***<br>(0.12) |
| New IO Memberships<br>X Previous Military Regime | 0.05***<br>(0.01)  |
| <i>Reversal Model</i>                            |                    |
| New IO Memberships                               | -0.29<br>(0.18)    |
| Previous Military Regime                         | 12.56***<br>(4.48) |
| New IO Memberships<br>X Previous Military Regime | -1.03<br>(0.65)    |
| Number of Observations                           | 1,220              |

**Regression Output (Full Stata Output):**

```

initial:      log pseudolikelihood = -3410.7396
alternative:  log pseudolikelihood = -1655.2599
rescale:     log pseudolikelihood = -1470.8337
rescale eq:  log pseudolikelihood = -1266.3415
Iteration 0:  log pseudolikelihood = -1266.3415 (not concave)
...
Iteration 133: log pseudolikelihood = -810.96314

                                Number of obs =      1220
                                Wald chi2(8)   =     1318.63
                                Prob > chi2    =       0.0000

Log pseudolikelihood = -810.96314

```

|              | Coef.     | Robust Std. Err. | z      | P> z  | [95% Conf. Interval] |           |
|--------------|-----------|------------------|--------|-------|----------------------|-----------|
| -----        |           |                  |        |       |                      |           |
| dem_consol~n |           |                  |        |       |                      |           |
| IO_N_diff    | .0479422  | .0048492         | 9.89   | 0.000 | .0384379             | .0574464  |
| mil          | -.9668396 | .1179917         | -8.19  | 0.000 | -1.198099            | -.7355801 |
| IO_diff_mil  | .0470261  | .0080479         | 5.84   | 0.000 | .0312525             | .0627997  |
| gdp          | .1187162  | .0565327         | 2.10   | 0.036 | .0079141             | .2295183  |
| growth       | .0234537  | .0065676         | 3.57   | 0.000 | .0105814             | .036326   |
| exec_pres    | -.296659  | .0789373         | -3.76  | 0.000 | -.4513732            | -.1419448 |
| s_un_glo     | 2.289898  | .2616058         | 8.75   | 0.000 | 1.77716              | 2.802636  |
| mills        | -.1457466 | .0302463         | -4.82  | 0.000 | -.2050283            | -.0864649 |
| _cons        | 1.120073  | .3914284         | 2.86   | 0.004 | .3528874             | 1.887259  |
| -----        |           |                  |        |       |                      |           |
| alpha        |           |                  |        |       |                      |           |
| _cons        | -.8605867 | .0481772         | -17.86 | 0.000 | -.9550122            | -.7661612 |
| -----        |           |                  |        |       |                      |           |
| reversal     |           |                  |        |       |                      |           |
| IO_N_diff    | -.2857802 | .1763331         | -1.62  | 0.105 | -.6313868            | .0598265  |
| mil          | 12.56331  | 4.479495         | 2.80   | 0.005 | 3.783663             | 21.34296  |
| IO_diff_mil  | -1.029435 | .6513551         | -1.58  | 0.114 | -2.306067            | .2471977  |
| gdp          | 13.33938  | 6.111377         | 2.18   | 0.029 | 1.361297             | 25.31746  |
| growth       | -.2870149 | .1850158         | -1.55  | 0.121 | -.6496393            | .0756094  |
| exec_pres    | 38.9511   | 14.21049         | 2.74   | 0.006 | 11.09906             | 66.80315  |
| s_un_glo     | -27.48628 | 13.60252         | -2.02  | 0.043 | -54.14672            | -.8258393 |
| mills        | -23.28178 | 9.294129         | -2.50  | 0.012 | -41.49794            | -5.065623 |
| _cons        | -70.69464 | 30.90274         | -2.29  | 0.022 | -131.2629            | -10.12637 |
| -----        |           |                  |        |       |                      |           |



## CROSS TABS OF IO INFLUENCE ON AUTOCRATIC REVERSAL RATES, BY IO INDEPENDENCE

\*\* All Countries  
 . noi ttest c, by(above\_median)  
 Two-sample t test with equal variances

| Group    | Obs | Mean     | Std. Err. |
|----------|-----|----------|-----------|
| 0        | 165 | .2060606 | .0315842  |
| 1        | 73  | .1506849 | .0421602  |
| combined | 238 | .1890756 | .0254351  |
| diff     |     | .0553757 | .0551569  |

Ho: mean(0) - mean(1) = diff = 0  
 Ha: diff != 0  
 t = 1.0040  
 P > |t| = 0.3164

\*\* With Military Past  
 . noi ttest c if mil~=0, by(above\_median)  
 Two-sample t test with equal variances

| Group    | Obs | Mean      | Std. Err. |
|----------|-----|-----------|-----------|
| 0        | 99  | .3232323  | .0472459  |
| 1        | 34  | .3235294  | .0814375  |
| combined | 133 | .3233083  | .0407115  |
| diff     |     | -.0002971 | .0936834  |

Ho: mean(0) - mean(1) = diff = 0  
 Ha: diff != 0  
 t = -0.0032  
 P > |t| = 0.9975

\*\* Without Military Past  
 . noi ttest c if mil==0, by(above\_median)  
 Two-sample t test with equal variances

| Group    | Obs | Mean     | Std. Err. |
|----------|-----|----------|-----------|
| 0        | 66  | .030303  | .021262   |
| 1        | 39  | 0        | 0         |
| combined | 105 | .0190476 | .0134038  |
| diff     |     | .030303  | .0277144  |

Ho: mean(0) - mean(1) = diff = 0  
 Ha: diff != 0  
 t = 1.0934  
 P > |t| = 0.2768

## CROSS TABS OF IO INFLUENCE ON AUTOCRATIC REVERSAL RATES, BY IO DEMOCRATIC DENSITY

\*No Military history

. noi ttest c if mil~=0, by(above\_median)

Two-sample t test with equal variances

```
-----  
Group      | Obs Mean Std. Err.  
-----+-----  
0          | 102 .3627451 .0478406  
1          | 93 .344086 .0495294  
-----+-----  
combined   | 195 .3538462 .03433  
-----+-----  
diff       | .0186591 .0688981  
-----
```

Ho: mean(0) - mean(1) = diff = 0

Ha: diff != 0

t = 0.2708

P > |t| = 0.7868

\*Military history

. noi ttest c if mil==0, by(above\_median)

Two-sample t test with equal variances

```
-----  
Group      | Obs Mean Std. Err.  
-----+-----  
0          | 111 .1531532 .0343375  
1          | 79 .0506329 .0248248  
-----+-----  
combined   | 190 .1105263 .022807  
-----+-----  
diff       | .1025202 .0457915  
-----
```

Ho: mean(0) - mean(1) = diff = 0

Ha: diff != 0

t = 2.2388

P > |t| = 0.0263
